# Supplementary material
Source: ML conference proceedings conference paper supplement (https://openreview.net/forum?id=SsVVrDheMH)
Supplement: supplementary_material [file attachment]

## A ICONBANK

The construction of IconBank involves the following steps:

- Crawl icon-label pairs from Flaticon.
- Leverage the state-of-the-art vision-language model (LLaVA [27]) to generate detailed descriptions for these icons (see Figure 10).
- Leverage CLIP [39] to filter low-quality samples whose icon and description similarity is lower than a given threshold.

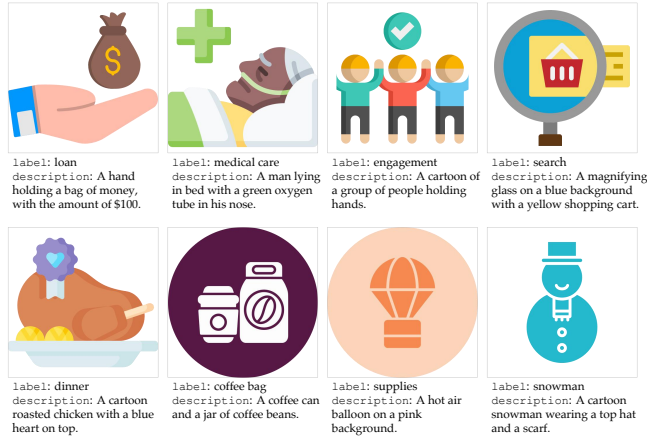

Figure 10: Some samples of IconBank.

## B ICONBENCH

We leverage ChatGPT to generate 100 test concepts with this prompt: "I am designing an icon generation model. Please help me generate a total of 100 concepts which are used for model evaluation. 50 of

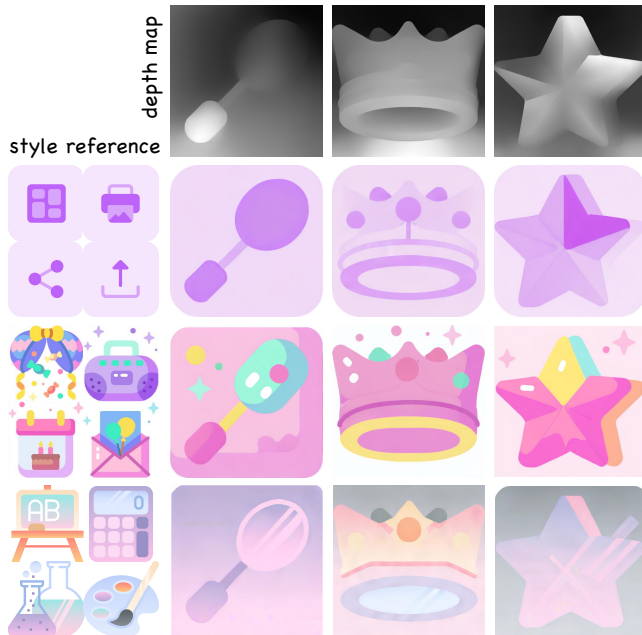

Figure 11: IconDM can create novel icons from depth images.

| ID | Abstract Concepts | ID  | Concrete Concepts  |
|----|-------------------|-----|--------------------|
| 1  | security          | 51  | apple              |
| 2  | globalization     | 52  | house              |
| 3  | inspiration       | 53  | cat                |
| 4  | health            | 54  | dog                |
| 5  | environment       | 55  | tree               |
| 6  | progress          | 56  | car                |
| 7  | freedom           | 57  | flower             |
| 8  | collaboration     | 58  | star               |
| 9  | growth            | 59  | bicycle            |
| 10 | efficiency        | 60  | computer           |
| 11 | strength          | 61  | key                |
| 12 | technology        | 62  | ball               |
| 13 | poison            | 63  | rocket             |
| 14 | privacy           | 64  | map                |
| 15 | entertainment     | 65  | fire               |
| 16 | engineering       | 66  | bird               |
| 17 | trend             | 67  | guitar             |
| 18 | verification      | 68  | present            |
| 19 | transformation    | 69  | cake               |
| 20 | support           | 70  | badge              |
| 21 | fairness          | 71  | microphone         |
| 22 | information       | 72  | battery            |
| 23 | system            | 73  | bell               |
| 24 | hope              | 74  | train              |
| 25 | goal              | 75  | glasses            |
| 26 | friendship        | 76  | scissors           |
| 27 | creativity        | 77  | Mount Fuji         |
| 28 | education         | 78  | Eiffel Tower       |
| 29 | wisdom            | 79  | pyramid            |
| 30 | sustainability    | 80  | Sydney Opera House |
| 31 | leadership        | 81  | sandwich           |
| 32 | courage           | 82  | playground         |
| 33 | justice           | 83  | park               |
| 34 | celebration       | 84  | bag                |
| 35 | challenge         | 85  | farm               |
| 36 | opportunity       | 86  | tent               |
| 37 | speed             | 87  | wallet             |
| 38 | fusion            | 88  | trophy             |
| 39 | strategy          | 89  | mortarboard        |
| 40 | solution          | 90  | beverage           |
| 41 | risk              | 91  | coffee             |
| 42 | success           | 92  | orange             |
| 43 | failure           | 93  | hamburger          |
| 44 | curiosity         | 94  | candy              |
| 45 | respect           | 95  | ice cream          |
| 46 | impact            | 96  | egg                |
| 47 | confidence        | 97  | fish               |
| 48 | service           | 98  | school             |
| 49 | music             | 99  | hospital           |
| 50 | update            | 100 | shoes              |

Table 4: The complete list of concepts in IconBench.

1277 *them are concrete concepts, such as apple, house, cat. The other 50*  
 1278 *are abstract concepts, such as security, globalization, etc. Ensure that*  
 1279 *these concepts have large coverage so that the evaluation better reflects*  
 1280 *model performance."* We observe that there are duplicate concepts  
 1281 in the output of ChatGPT, so we perform 2-3 rounds of this process  
 1282 to remove duplicate concepts and get the final list (see Table 4).

## 1335 C MORE RESULTS WITH CONTROLNET

1336 In addition to canny images, with the support of ControlNet [59],  
 1337 IconDM can also generate icons based on depth images (see Fig-  
 1338 ure 11). 1339

## 1340 D MORE QUALITATIVE RESULTS

1341 More qualitative results and comparison are shown in Figure 12  
 1342 and Figure 13, respectively. 1343

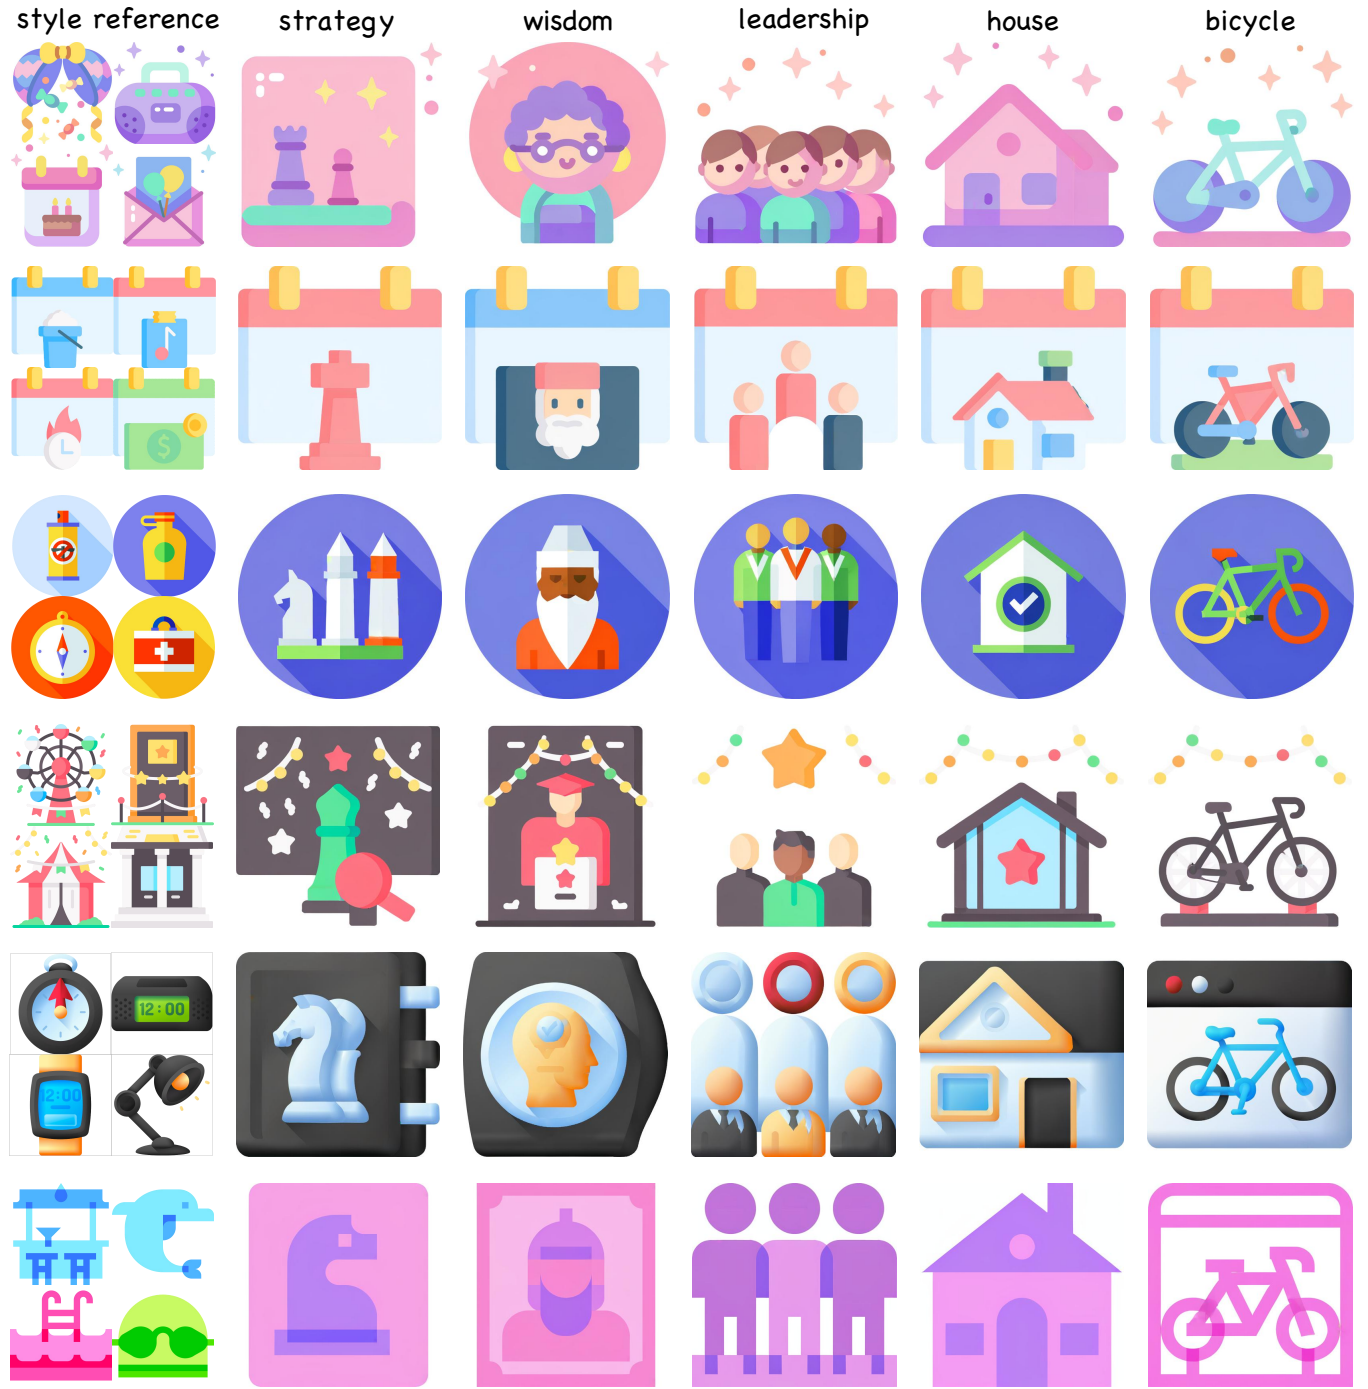

Figure 12: More qualitative results of IconDM.

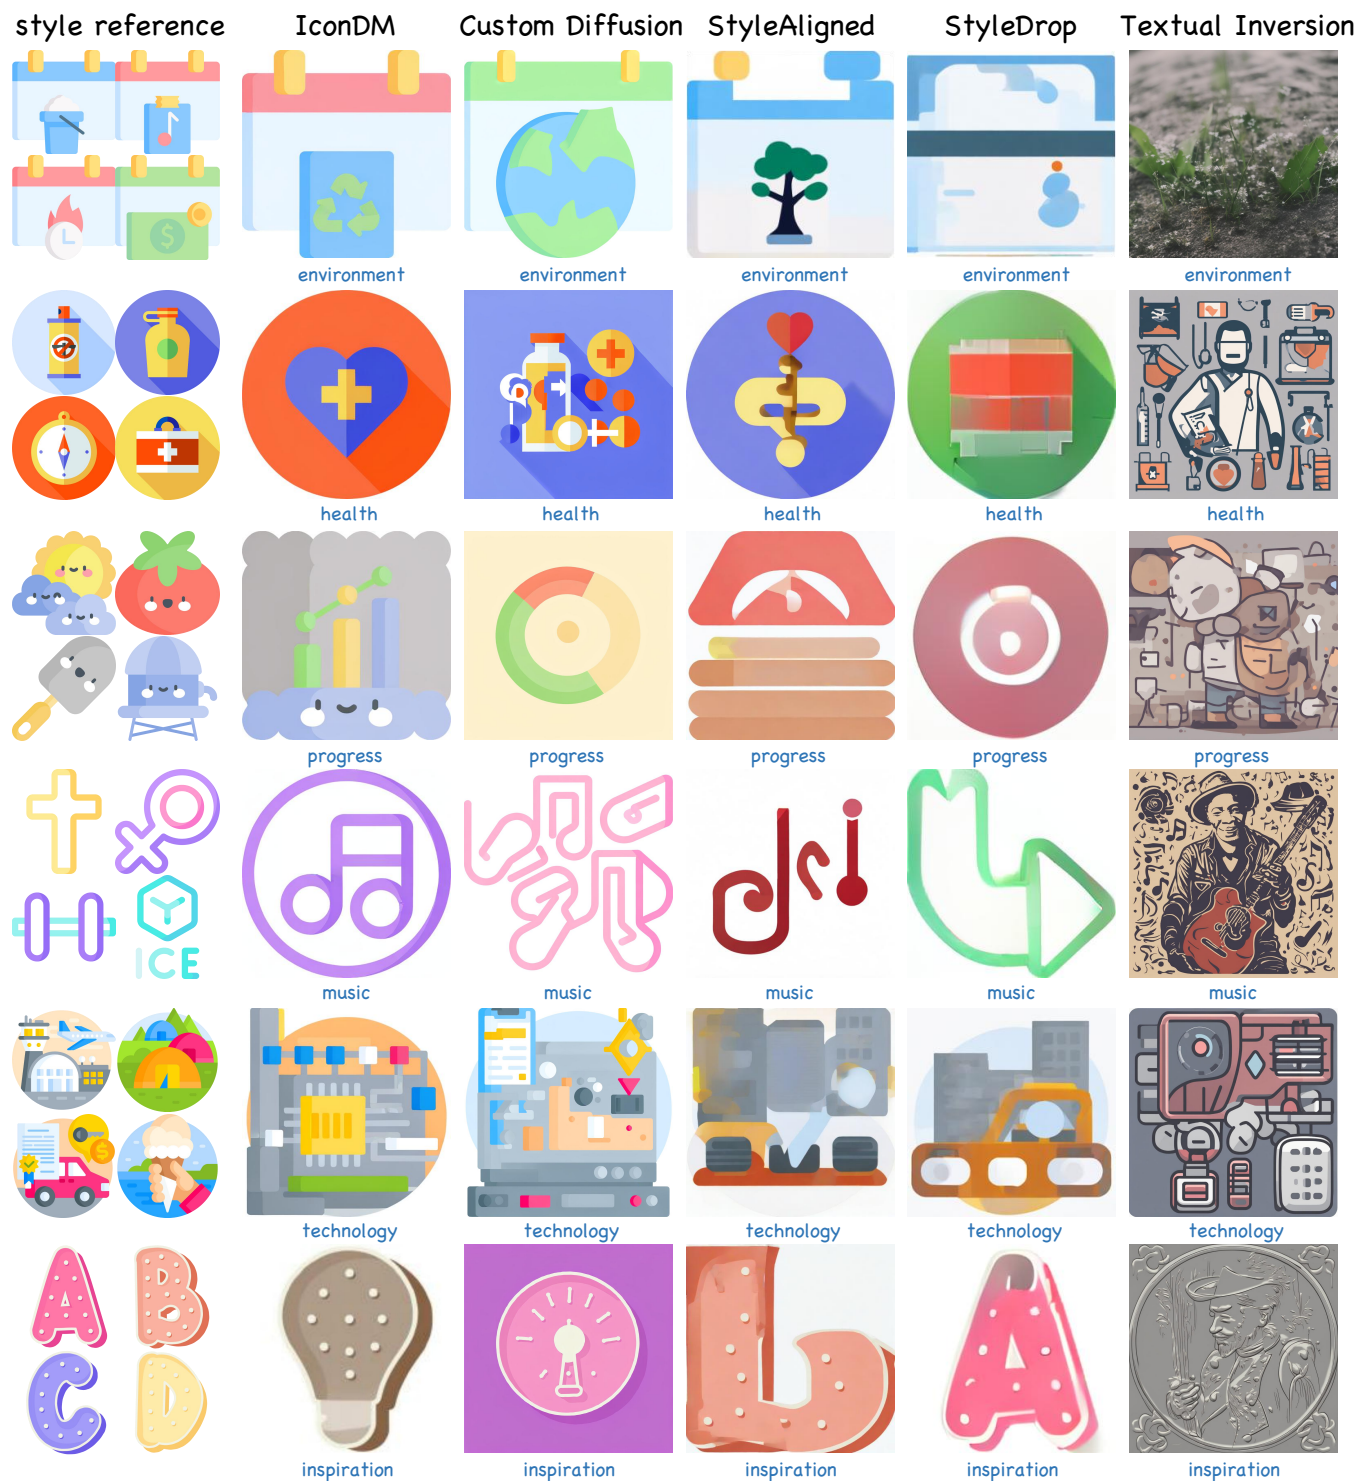

Figure 13: More qualitative comparison between IconDM and baselines.
